# Supplementary material for: Green Extraction Processes for Complex Samples from Vegetable Matrices Coupled with On-Line Detection System: A Critical Review
Source: MDPI journal article supplement (doi:10.3390/molecules27196272), 2022-09-23
Supplement: s1 [file s1]

## SUPPLEMENTARY MATERIAL

### **Green Extraction Processes for Complex Samples from Vegetable Origin Coupled with On-line Detection System: A Critical review**

Francisco W. Maciel-Silva<sup>1</sup>, Daniel Lachos-Perez<sup>2</sup>, Luz Selene Buller<sup>1</sup>, William Gustavo Sganzerla<sup>1</sup>, Montserrat Pérez<sup>3</sup>, Mauricio A. Rostagno<sup>4\*</sup>, Tânia Forster-Carneiro<sup>1</sup>

<sup>1</sup>*School of Food Engineering (FEA), University of Campinas (UNICAMP), Rua Monteiro Lobato, n.80, 13083-862 Campinas, São Paulo, Brazil.*

<sup>2</sup>*Department of Chemical Engineering, Federal University of Santa Maria, 1000, Roraima Avenue, Santa Maria, RS, 97105-900, Brazil.*

<sup>3</sup>*Department of Environmental Technologies, University of Cadiz, Campus de Puerto Real, s/n. 11500 Puerto Real, Cadiz, Spain*

<sup>4</sup>*School of Applied Sciences (FCA), University of Campinas (UNICAMP), Rua Pedro Zaccaria, n. 1300, 13484-350, Limeira, São Paulo, Brazil.*

\* Corresponding author:

E-mail address: mauricio.rostagno@fca.unicamp.br

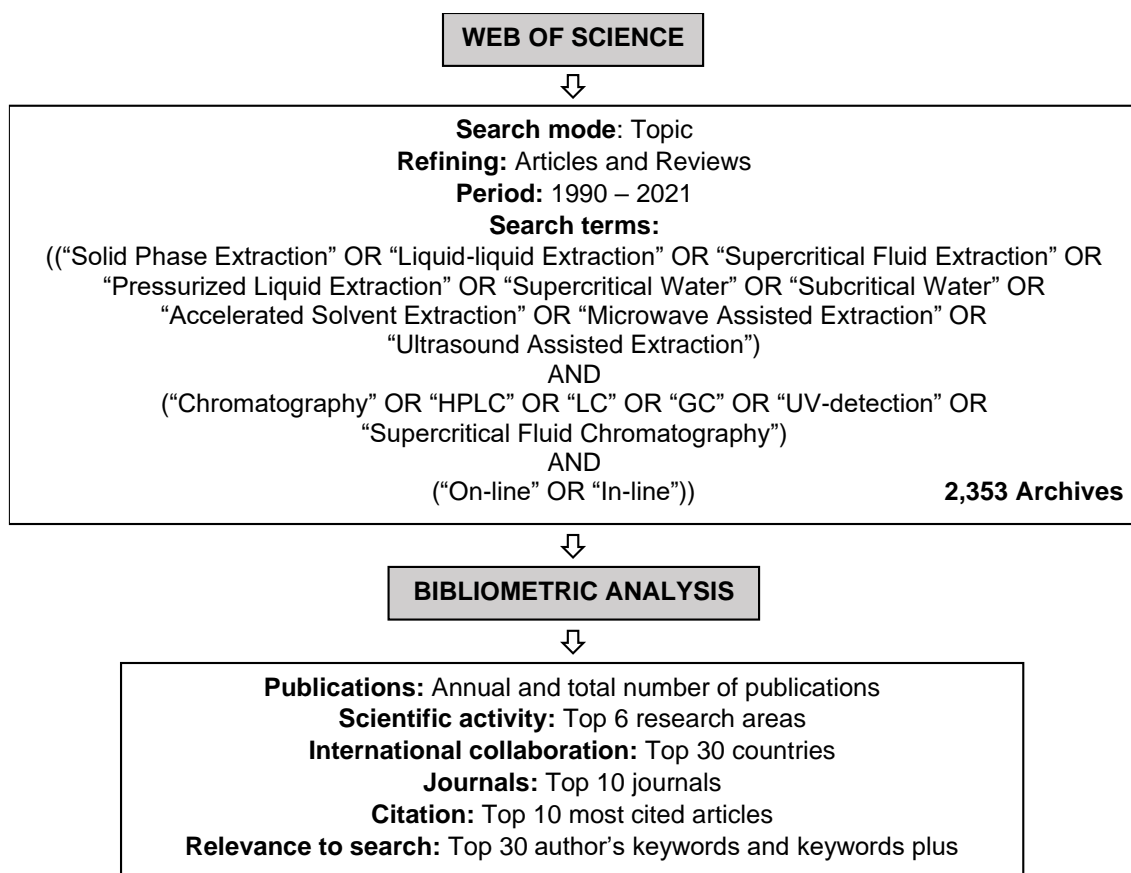

**Figure S1.** Methodological synthesis applied to the bibliometric analysis.
